# Supplementary material for: The Urinary Metabolome of Newborns with Perinatal Complications
Source: MDPI journal article supplement (doi:10.3390/metabo14010041), 2024-01-10
Supplement: s1 [file s1]

Supplementary Table S1: Compound classification. For classification into compound classes, ClassyFire (<http://classyfire.wishartlab.com>) was used.

| HMDB        | Class                                |
|-------------|--------------------------------------|
| HMDB0000043 | Amino acids, peptides, and analogues |
| HMDB0000056 | Amino acids, peptides, and analogues |
| HMDB0000064 | Amino acids, peptides, and analogues |
| HMDB0000070 | Amino acids, peptides, and analogues |
| HMDB0000092 | Amino acids, peptides, and analogues |
| HMDB0000099 | Amino acids, peptides, and analogues |
| HMDB0000112 | Amino acids, peptides, and analogues |
| HMDB0000123 | Amino acids, peptides, and analogues |
| HMDB0000128 | Amino acids, peptides, and analogues |
| HMDB0000148 | Amino acids, peptides, and analogues |
| HMDB0000158 | Amino acids, peptides, and analogues |
| HMDB0000159 | Amino acids, peptides, and analogues |
| HMDB0000161 | Amino acids, peptides, and analogues |
| HMDB0000162 | Amino acids, peptides, and analogues |
| HMDB0000167 | Amino acids, peptides, and analogues |
| HMDB0000168 | Amino acids, peptides, and analogues |
| HMDB0000172 | Amino acids, peptides, and analogues |
| HMDB0000177 | Amino acids, peptides, and analogues |
| HMDB0000181 | Amino acids, peptides, and analogues |
| HMDB0000182 | Amino acids, peptides, and analogues |
| HMDB0000187 | Amino acids, peptides, and analogues |
| HMDB0000191 | Amino acids, peptides, and analogues |
| HMDB0000206 | Amino acids, peptides, and analogues |
| HMDB0000214 | Amino acids, peptides, and analogues |
| HMDB0000267 | Amino acids, peptides, and analogues |
| HMDB0000271 | Amino acids, peptides, and analogues |
| HMDB0000446 | Amino acids, peptides, and analogues |
| HMDB0000450 | Amino acids, peptides, and analogues |
| HMDB0000452 | Amino acids, peptides, and analogues |
| HMDB0000479 | Amino acids, peptides, and analogues |
| HMDB0000517 | Amino acids, peptides, and analogues |
| HMDB0000532 | Amino acids, peptides, and analogues |
| HMDB0000562 | Amino acids, peptides, and analogues |
| HMDB0000641 | Amino acids, peptides, and analogues |
| HMDB0000650 | Amino acids, peptides, and analogues |

|             |                                      |
|-------------|--------------------------------------|
| HMDB0000679 | Amino acids, peptides, and analogues |
| HMDB0000687 | Amino acids, peptides, and analogues |
| HMDB0000696 | Amino acids, peptides, and analogues |
| HMDB0000725 | Amino acids, peptides, and analogues |
| HMDB0000766 | Amino acids, peptides, and analogues |
| HMDB0000812 | Amino acids, peptides, and analogues |
| HMDB0000866 | Amino acids, peptides, and analogues |
| HMDB0000883 | Amino acids, peptides, and analogues |
| HMDB0000904 | Amino acids, peptides, and analogues |
| HMDB0000959 | Amino acids, peptides, and analogues |
| HMDB0001138 | Amino acids, peptides, and analogues |
| HMDB0001539 | Amino acids, peptides, and analogues |
| HMDB0001904 | Amino acids, peptides, and analogues |
| HMDB0002005 | Amino acids, peptides, and analogues |
| HMDB0002931 | Amino acids, peptides, and analogues |
| HMDB0003148 | Amino acids, peptides, and analogues |
| HMDB0003334 | Amino acids, peptides, and analogues |
| HMDB0003357 | Amino acids, peptides, and analogues |
| HMDB0003911 | Amino acids, peptides, and analogues |
| HMDB0004620 | Amino acids, peptides, and analogues |
| HMDB0006028 | Amino acids, peptides, and analogues |
| HMDB0006029 | Amino acids, peptides, and analogues |
| HMDB0006344 | Amino acids, peptides, and analogues |
| HMDB0011745 | Amino acids, peptides, and analogues |
| HMDB0011756 | Amino acids, peptides, and analogues |
| HMDB0011757 | Amino acids, peptides, and analogues |
| HMDB0013713 | Amino acids, peptides, and analogues |
| HMDB0032055 | Amino acids, peptides, and analogues |
| HMDB0061684 | Amino acids, peptides, and analogues |
| HMDB0094701 | Amino acids, peptides, and analogues |
| HMDB0240251 | Amino acids, peptides, and analogues |
| HMDB0255052 | Amino acids, peptides, and analogues |
| HMDB0302754 | Amino acids, peptides, and analogues |
| HMDB0000462 | Azoles                               |
| HMDB0000500 | Benzene and substituted derivatives  |
| HMDB0000714 | Benzene and substituted derivatives  |
| HMDB0001870 | Benzene and substituted derivatives  |
| HMDB0001895 | Benzene and substituted derivatives  |
| HMDB0013678 | Benzene and substituted derivatives  |

|             |                                     |
|-------------|-------------------------------------|
| HMDB0000306 | Benzene and substituted derivatives |
| HMDB0012275 | Benzene and substituted derivatives |
| HMDB0000669 | Benzene and substituted derivatives |
| HMDB0000707 | Benzene and substituted derivatives |
| HMDB0000209 | Benzene and substituted derivatives |
| HMDB0001276 | Carboximidic acids and derivatives  |
| HMDB0002064 | Carboximidic acids and derivatives  |
| HMDB0002172 | Carboximidic acids and derivatives  |
| HMDB0000237 | Carboxylic acids and derivatives    |
| HMDB0001873 | Carboxylic acids and derivatives    |
| HMDB0000134 | Carboxylic acids and derivatives    |
| HMDB0000176 | Carboxylic acids and derivatives    |
| HMDB0000202 | Carboxylic acids and derivatives    |
| HMDB0000254 | Carboxylic acids and derivatives    |
| HMDB0000661 | Carboxylic acids and derivatives    |
| HMDB0000691 | Carboxylic acids and derivatives    |
| HMDB0000072 | Carboxylic acids and derivatives    |
| HMDB0000094 | Carboxylic acids and derivatives    |
| HMDB0000193 | Carboxylic acids and derivatives    |
| HMDB0013327 | Carboxylic acids and derivatives    |
| HMDB0001964 | Cinnamic acids and derivatives      |
| HMDB0000226 | Diazines                            |
| HMDB0000262 | Diazines                            |
| HMDB0000300 | Diazines                            |
| HMDB0000630 | Diazines                            |
| HMDB0000201 | Fatty Acyls                         |
| HMDB0000222 | Fatty Acyls                         |
| HMDB0000552 | Fatty Acyls                         |
| HMDB0000651 | Fatty Acyls                         |
| HMDB0000756 | Fatty Acyls                         |
| HMDB0000791 | Fatty Acyls                         |
| HMDB0000824 | Fatty Acyls                         |
| HMDB0000848 | Fatty Acyls                         |
| HMDB0002013 | Fatty Acyls                         |
| HMDB0002014 | Fatty Acyls                         |
| HMDB0002250 | Fatty Acyls                         |
| HMDB0002366 | Fatty Acyls                         |
| HMDB0005066 | Fatty Acyls                         |
| HMDB0006320 | Fatty Acyls                         |

|             |                      |
|-------------|----------------------|
| HMDB0006464 | Fatty Acyls          |
| HMDB0006469 | Fatty Acyls          |
| HMDB0013124 | Fatty Acyls          |
| HMDB0013125 | Fatty Acyls          |
| HMDB0013126 | Fatty Acyls          |
| HMDB0013127 | Fatty Acyls          |
| HMDB0013128 | Fatty Acyls          |
| HMDB0013129 | Fatty Acyls          |
| HMDB0013130 | Fatty Acyls          |
| HMDB0013161 | Fatty Acyls          |
| HMDB0013205 | Fatty Acyls          |
| HMDB0013207 | Fatty Acyls          |
| HMDB0013326 | Fatty Acyls          |
| HMDB0013328 | Fatty Acyls          |
| HMDB0013330 | Fatty Acyls          |
| HMDB0013331 | Fatty Acyls          |
| HMDB0013332 | Fatty Acyls          |
| HMDB0013333 | Fatty Acyls          |
| HMDB0013334 | Fatty Acyls          |
| HMDB0013335 | Fatty Acyls          |
| HMDB0013336 | Fatty Acyls          |
| HMDB0013340 | Fatty Acyls          |
| HMDB0241094 | Fatty Acyls          |
| HMDB0241102 | Fatty Acyls          |
| HMDB0000039 | Fatty Acyls          |
| HMDB0000317 | Fatty Acyls          |
| HMDB0000407 | Fatty Acyls          |
| HMDB0000482 | Fatty Acyls          |
| HMDB0000535 | Fatty Acyls          |
| HMDB0000555 | Fatty Acyls          |
| HMDB0000622 | Fatty Acyls          |
| HMDB0000718 | Fatty Acyls          |
| HMDB0000754 | Fatty Acyls          |
| HMDB0000892 | Fatty Acyls          |
| HMDB0001987 | Fatty Acyls          |
| HMDB0061112 | Fatty Acyls          |
| HMDB0005876 | Fatty Acyls          |
| HMDB0004812 | Furans               |
| HMDB0002815 | Glycerophospholipids |

|             |                               |
|-------------|-------------------------------|
| HMDB0007874 | Glycerophospholipids          |
| HMDB0007886 | Glycerophospholipids          |
| HMDB0007892 | Glycerophospholipids          |
| HMDB0007893 | Glycerophospholipids          |
| HMDB0007977 | Glycerophospholipids          |
| HMDB0007985 | Glycerophospholipids          |
| HMDB0007991 | Glycerophospholipids          |
| HMDB0007993 | Glycerophospholipids          |
| HMDB0008002 | Glycerophospholipids          |
| HMDB0008052 | Glycerophospholipids          |
| HMDB0008057 | Glycerophospholipids          |
| HMDB0008083 | Glycerophospholipids          |
| HMDB0008089 | Glycerophospholipids          |
| HMDB0008276 | Glycerophospholipids          |
| HMDB0008688 | Glycerophospholipids          |
| HMDB0008690 | Glycerophospholipids          |
| HMDB0010379 | Glycerophospholipids          |
| HMDB0010382 | Glycerophospholipids          |
| HMDB0010383 | Glycerophospholipids          |
| HMDB0010384 | Glycerophospholipids          |
| HMDB0010385 | Glycerophospholipids          |
| HMDB0010386 | Glycerophospholipids          |
| HMDB0010393 | Glycerophospholipids          |
| HMDB0010394 | Glycerophospholipids          |
| HMDB0010395 | Glycerophospholipids          |
| HMDB0010396 | Glycerophospholipids          |
| HMDB0010405 | Glycerophospholipids          |
| HMDB0011128 | Glycerophospholipids          |
| HMDB0012108 | Glycerophospholipids          |
| HMDB0013406 | Glycerophospholipids          |
| HMDB0013417 | Glycerophospholipids          |
| HMDB0013422 | Glycerophospholipids          |
| HMDB0029205 | Glycerophospholipids          |
| HMDB0029206 | Glycerophospholipids          |
| HMDB0029220 | Glycerophospholipids          |
| HMDB0029221 | Glycerophospholipids          |
| HMDB0000008 | Hydroxy acids and derivatives |
| HMDB0000190 | Hydroxy acids and derivatives |
| HMDB0000729 | Hydroxy acids and derivatives |

|             |                                        |
|-------------|----------------------------------------|
| HMDB0000011 | Hydroxy acids and derivatives          |
| HMDB0000156 | Hydroxy acids and derivatives          |
| HMDB0000336 | Hydroxy acids and derivatives          |
| HMDB0000337 | Hydroxy acids and derivatives          |
| HMDB0059655 | Hydroxy acids and derivatives          |
| HMDB0000034 | Imidazopyrimidines                     |
| HMDB0000132 | Imidazopyrimidines                     |
| HMDB0000157 | Imidazopyrimidines                     |
| HMDB0000289 | Imidazopyrimidines                     |
| HMDB0000292 | Imidazopyrimidines                     |
| HMDB0000897 | Imidazopyrimidines                     |
| HMDB0003320 | Indoles and derivatives                |
| HMDB0000738 | Indoles and derivatives                |
| HMDB0029739 | Indoles and derivatives                |
| HMDB0000197 | Indoles and derivatives                |
| HMDB0000671 | Indoles and derivatives                |
| HMDB0000763 | Indoles and derivatives                |
| HMDB0000929 | Indoles and derivatives                |
| HMDB0002302 | Indoles and derivatives                |
| HMDB0000259 | Indoles and derivatives                |
| HMDB0000303 | Indoles and derivatives                |
| HMDB0004095 | Indoles and derivatives                |
| HMDB0000243 | Keto acids and derivatives             |
| HMDB0000208 | Keto acids and derivatives             |
| HMDB0000225 | Keto acids and derivatives             |
| HMDB0000019 | Keto acids and derivatives             |
| HMDB0000060 | Keto acids and derivatives             |
| HMDB0000695 | Keto acids and derivatives             |
| HMDB0000251 | Organic sulfonic acids and derivatives |
| HMDB0000682 | Organic sulfuric acids and derivatives |
| HMDB0011635 | Organic sulfuric acids and derivatives |
| HMDB0062551 | Organic sulfuric acids and derivatives |
| HMDB0000002 | Organonitrogen compounds               |
| HMDB0000087 | Organonitrogen compounds               |
| HMDB0000149 | Organonitrogen compounds               |
| HMDB0000164 | Organonitrogen compounds               |
| HMDB0000870 | Organonitrogen compounds               |
| HMDB0000906 | Organonitrogen compounds               |
| HMDB0001256 | Organonitrogen compounds               |

|             |                           |
|-------------|---------------------------|
| HMDB0001257 | Organonitrogen compounds  |
| HMDB0001414 | Organonitrogen compounds  |
| HMDB0000925 | Organonitrogen compounds  |
| HMDB0001432 | Organonitrogen compounds  |
| HMDB0013222 | Organonitrogen compounds  |
| HMDB0000062 | Organonitrogen compounds  |
| HMDB0000097 | Organonitrogen compounds  |
| HMDB0003070 | Organooxygen compounds    |
| HMDB0000122 | Organooxygen compounds    |
| HMDB0000139 | Organooxygen compounds    |
| HMDB0000943 | Organooxygen compounds    |
| HMDB0000956 | Organooxygen compounds    |
| HMDB0010319 | Organooxygen compounds    |
| HMDB0253456 | Organooxygen compounds    |
| HMDB0000684 | Organooxygen compounds    |
| HMDB0000033 | Peptidomimetics           |
| HMDB0000020 | Phenols                   |
| HMDB0000440 | Phenols                   |
| HMDB0000068 | Phenols                   |
| HMDB0000073 | Phenols                   |
| HMDB0000216 | Phenols                   |
| HMDB0000022 | Phenols                   |
| HMDB0000118 | Phenols                   |
| HMDB0000071 | Purine nucleosides        |
| HMDB0000085 | Purine nucleosides        |
| HMDB0000101 | Purine nucleosides        |
| HMDB0000050 | Purine nucleosides        |
| HMDB0000133 | Purine nucleosides        |
| HMDB0000195 | Purine nucleosides        |
| HMDB0000299 | Purine nucleosides        |
| HMDB0000058 | Purine nucleotides        |
| HMDB0000229 | Pyridine nucleotides      |
| HMDB0000232 | Pyridines and derivatives |
| HMDB0000699 | Pyridines and derivatives |
| HMDB0004193 | Pyridines and derivatives |
| HMDB0000012 | Pyrimidine nucleosides    |
| HMDB0000014 | Pyrimidine nucleosides    |
| HMDB0000273 | Pyrimidine nucleosides    |
| HMDB0000296 | Pyrimidine nucleosides    |

|             |                            |
|-------------|----------------------------|
| HMDB0000884 | Pyrimidine nucleosides     |
| HMDB0000715 | Quinolines and derivatives |
| HMDB0000842 | Quinolines and derivatives |
| HMDB0257047 | Quinolines and derivatives |
| HMDB0001348 | Sphingolipids              |
| HMDB0010169 | Sphingolipids              |
| HMDB0012100 | Sphingolipids              |
| HMDB0012101 | Sphingolipids              |
| HMDB0013462 | Sphingolipids              |
| HMDB0013463 | Sphingolipids              |
| HMDB0013465 | Sphingolipids              |
| HMDB0013466 | Sphingolipids              |
| HMDB0013467 | Sphingolipids              |
| HMDB0013469 | Sphingolipids              |
| HMDB0240613 | Sphingolipids              |
