# Supplementary material for: The Urinary Metabolome of Newborns with Perinatal Complications
Source: MDPI journal article supplement (doi:10.3390/metabo14010041), 2024-01-10
Supplement: s1 [file s1]

Supplementary Table S4: Fold Changes (FC) for Healthy vs. NICU newborns

|                             | FC      | log2(FC) | raw.pval   |
|-----------------------------|---------|----------|------------|
| 3-Deoxyglucosone            | 10.106  | 3.3371   | 2.11E-15   |
| Benzoic acid                | 6.5667  | 2.7152   | 1.87E-08   |
| alpha-Ketoisovaleric acid   | 13.783  | 3.7849   | 7.70E-08   |
| C12DC                       | 0.35144 | -1.5087  | 9.05E-06   |
| 4-Hydroxyphenylpyruvic acid | 2.4877  | 1.3148   | 0.00010237 |
| Methionine                  | 1.9403  | 0.95627  | 0.0001653  |
| 2-oxoisocaproic acid        | 2.4898  | 1.316    | 0.00017806 |
| alpha-Ketoglutaric acid     | 2.9487  | 1.5601   | 0.00027767 |
| Xanthosine                  | 0.57869 | -0.78914 | 0.00042464 |
| Total Dimethylarginine      | 0.65794 | -0.60397 | 0.00060146 |
| cis-Aconitic acid           | 0.56326 | -0.82814 | 0.00061839 |
| Shikimic acid               | 0.66051 | -0.59836 | 0.00069908 |
| 5-Oxoproline                | 0.56991 | -0.81119 | 0.00086532 |
| Methionine Sulfoxide        | 0.41352 | -1.274   | 0.00092927 |
| C6:1                        | 1.6951  | 0.76138  | 0.0012013  |
| Threonic acid               | 0.65705 | -0.60593 | 0.0018799  |
| Isocitric acid              | 0.51971 | -0.94423 | 0.0020342  |
| Proline                     | 1.937   | 0.95385  | 0.0020893  |
| Beta Alanine                | 1.6684  | 0.73848  | 0.0021301  |
| Pipecolic acid              | 0.63847 | -0.64732 | 0.0021893  |
| 2-Hydroxyisobutyric acid    | 2.0775  | 1.0548   | 0.003599   |
| Histamine                   | 2.2331  | 1.159    | 0.0036334  |
| Allantoin                   | 0.64908 | -0.62354 | 0.0039944  |
| N-Acetyl-Glutamic acid      | 0.7605  | -0.39498 | 0.0041138  |
| Indoxyl sulfate             | 0.51593 | -0.95477 | 0.0044945  |
| C10                         | 0.62529 | -0.6774  | 0.0046452  |
| Xanthine                    | 0.41308 | -1.2755  | 0.0050177  |
| Hippuric acid               | 0.30993 | -1.69    | 0.0051193  |
| C16:1                       | 1.9368  | 0.95366  | 0.0052316  |
| Carnosine                   | 5.4296  | 2.4409   | 0.005247   |
| Phenylacetylglutamine       | 0.50854 | -0.97557 | 0.0052629  |
| 3-Hydroxyisobutyric acid    | 2.3125  | 1.2094   | 0.0056993  |
| Asymmetric dimethylarginine | 0.72637 | -0.46123 | 0.0060758  |
| Sarcosine                   | 1.5937  | 0.67237  | 0.0067383  |
| C12                         | 0.56257 | -0.82989 | 0.0067558  |
| SM C16:0                    | 0.28144 | -1.8291  | 0.0071411  |

|                            |         |          |           |
|----------------------------|---------|----------|-----------|
| trans-4-Hydroxyproline     | 1.3946  | 0.47984  | 0.0077776 |
| tyrosine/phe               | 0.72788 | -0.45822 | 0.0084522 |
| 3-Methyladipic acid        | 0.59232 | -0.75555 | 0.0087131 |
| Homocitrulline             | 0.63303 | -0.65966 | 0.0087446 |
| Quinaldic acid             | 2.1707  | 1.1182   | 0.008909  |
| C5:1DC                     | 1.5823  | 0.66198  | 0.0112    |
| Succinic acid              | 0.5222  | -0.93732 | 0.011743  |
| Guanidoacetic acid         | 0.65664 | -0.60683 | 0.011901  |
| Glutaric acid              | 0.60137 | -0.73367 | 0.012265  |
| 3-Methoxytyramine          | 0.65053 | -0.62031 | 0.013048  |
| N-Acetyl-Alanine           | 1.8407  | 0.88026  | 0.015675  |
| N-Acetyl-Methionine        | 0.72119 | -0.47155 | 0.021251  |
| arginine/ornithine         | 0.45585 | -1.1334  | 0.021567  |
| C5                         | 1.9732  | 0.98056  | 0.025093  |
| Pyruvic acid               | 2.5629  | 1.3578   | 0.026151  |
| C4                         | 2.0181  | 1.013    | 0.027957  |
| Lysine                     | 1.9017  | 0.92727  | 0.031381  |
| Tyramine                   | 0.6563  | -0.60758 | 0.031989  |
| Diacetylspermine           | 1.7577  | 0.81367  | 0.033004  |
| 4-Hydroxyphenylacetic acid | 0.60061 | -0.73551 | 0.037313  |
| Cystathionine              | 1.6042  | 0.68184  | 0.038076  |
| C0                         | 1.7265  | 0.78785  | 0.039794  |
| Ethylmalonic acid          | 0.67403 | -0.56911 | 0.044712  |
| 3-Hydroxyisovaleric acid   | 1.3817  | 0.46645  | 0.045623  |
| N-Acetyl-Serine            | 1.415   | 0.50079  | 0.04864   |
| Dimethylamine              | 0.73838 | -0.43756 | 0.04907   |
