# Supplementary material for: The Urinary Metabolome of Newborns with Perinatal Complications
Source: MDPI journal article supplement (doi:10.3390/metabo14010041), 2024-01-10
Supplement: s1 [file s1]

Supplementary Table S3: Perinatal characteristics and maternal history of newborns diagnosed with BPD and non-BPD newborns.

| Variable                                                      | BPD (N=12)       | Non-BPD (N=26)   | p-value*          |
|---------------------------------------------------------------|------------------|------------------|-------------------|
| <b>Perinatal outcomes</b>                                     |                  |                  |                   |
| Male Gender, n (%)                                            | 9 (75)           | 20 (77)          | 0.89              |
| Gestational Age (Wks), median (Q1-Q3)                         | 32.4 (30-33.6)   | 36.4 (35.5-38.2) | <b>&lt;0.0001</b> |
| Vaginal Birth, n (%)                                          | 5 (41)           | 15 (58)          | 0.35              |
| Reanimation, n (%)                                            | 9 (75)           | 10 (38)          | <b>0.03</b>       |
| Apgar (1 min), median (Q1-Q3)                                 | 6 (5.3-7.8)      | 8 (5.5-8)        | 0.32              |
| Apgar (5 min), median (Q1-Q3)                                 | 9 (7.3-9)        | 9 (7-9)          | 0.97              |
| Weight (g), mean $\pm$ SD                                     | 1668 $\pm$ 156.1 | 2420 $\pm$ 672.6 | <b>0.0005</b>     |
| Size(cm), mean $\pm$ SD                                       | 41.9 $\pm$ 1.8   | 46.4 $\pm$ 3.6   | <b>0.0003</b>     |
| Cephalic Perimeter (cm), mean $\pm$ SD                        | 29.3 $\pm$ 1.1   | 32.3 $\pm$ 2.7   | <b>0.0011</b>     |
| Hypothermia, n (%)                                            | 1 (8)            | 7 (27)           | 0.19              |
| Temperature (°C), mean $\pm$ SD                               | 36.4 $\pm$ 0.6   | 36.3 $\pm$ 0.9   | 0.85              |
| Cardiac Frequency (bpm), mean $\pm$ SD                        | 148.7 $\pm$ 16.6 | 151.2 $\pm$ 14.5 | 0.64              |
| Respiratory Frequency (bpm), median (Q1-Q3)                   | 59 (56-60)       | 55.5 (49.5-68)   | 0.91              |
| FiO2%, median (Q1-Q3)                                         | 80 (30-100)      | 30 (30-100)      | 0.11              |
| SaO2%, median (Q1-Q3)                                         | 94.5 (91-98.8)   | 97 (94.8-99)     | 0.27              |
| RT-PCR SARS-CoV-2, n (%)                                      | 0 (0)            | 0 (0)            | NA                |
| Antigen SARS-CoV-2, n (%)                                     | 0 (0)            | 0 (0)            | NA                |
| IgM SARS-CoV-2, n (%)                                         | 0 (0)            | 3 (12)           | 0.22              |
| IgG SARS-CoV-2, n (%)                                         | 5 (42)           | 3 (12)           | <b>0.03</b>       |
| Days at NICU, median (Q1-Q3)                                  | 40 (30.8-52.3)   | 17 (12.5-27.3)   | <b>&lt;0.0001</b> |
| Respiratory Distress Syndrome, n (%)                          | 5 (42)           | 0 (0)            | <b>0.0004</b>     |
| Transient Tachypnea, n (%)                                    | 5 (42)           | 12 (46)          | 0.79              |
| Intrauterine pneumonia, n (%)                                 | 10 (83)          | 7 (27)           | <b>0.001</b>      |
| Persistent Pulmonary Hypertension, n (%)                      | 3 (25)           | 3 (12)           | 0.29              |
| Pneumothorax, n (%)                                           | 0 (0)            | 2 (8)            | 0.32              |
| Respiratory Hypoxemic Failure, n (%)                          | 1 (8)            | 0 (0)            | 0.13              |
| Early Onset Sepsis, n (%)                                     | 4 (33)           | 4 (15)           | 0.20              |
| Necrotizing Enterocolitis 1 A, n (%)                          | 1 (8)            | 1 (4)            | 0.56              |
| Meconium Aspiration Syndrome, n (%)                           | 0 (0)            | 3 (12)           | 0.22              |
| Neonatal Depression by Anesthetics, n (%)                     | 0 (0)            | 3 (12)           | 0.22              |
| Hypoxic Ischemic Encephalopathy stage II with seizures, n (%) | 0 (0)            | 3 (12)           | 0.22              |

|                                                                  |                     |                     |                   |
|------------------------------------------------------------------|---------------------|---------------------|-------------------|
| Hypoxic Ischemic Encephalopathy stage II without seizures, n (%) | 1 (8)               | 5 (19)              | 0.39              |
| Intrauterine Growth Restriction, n (%)                           | 0 (0)               | 3 (12)              | 0.22              |
| Liver Hematoma, n (%)                                            | 1 (8)               | 1 (4)               | 0.56              |
| Hypertrophic Cardiomyopathy, n (%)                               | 0 (0)               | 0 (0)               | NA                |
| Patent Ductus Arteriosus, n (%)                                  | 4 (33)              | 1 (4)               | <b>0.012</b>      |
| Pharmacological Treatment, n (%)                                 | 3 (25)              | 0 (0)               | <b>0.007</b>      |
| Neonatal sepsis, n (%)                                           | 6 (50)              | 5 (19)              | 0.05              |
| Antibiotics, n (%)                                               | 11 (92)             | 17 (65)             | 0.08              |
| Nitric oxide, n (%)                                              | 0 (0)               | 1 (4)               | 0.49              |
| Caffeine, n (%)                                                  | 7 (58)              | 0 (0)               | <b>&lt;0.0001</b> |
| Surfactant, n (%)                                                | 5 (42)              | 0 (0)               | <b>0.0004</b>     |
| Lower Airway Infection, n (%)                                    | 0 (0)               | 1 (4)               | 0.49              |
| Intubation, n (%)                                                | 9 (75)              | 9 (35)              | <b>0.02</b>       |
| Oxygen Exposure Time <1 month, n (%)                             | 1 (8)               | 20 (77)             | <b>&lt;0.0001</b> |
| Oxygen Exposure Time >1 month, n (%)                             | 11 (92)             | 6 (23)              | <b>&lt;0.0001</b> |
| Discharge with Oxygen, n (%)                                     | 12 (100)            | 9 (35)              | <b>0.0002</b>     |
| <b>Laboratory data</b>                                           |                     |                     |                   |
| Hemoglobin (g/dL), mean $\pm$ SD                                 | 16.2 $\pm$ 2.7      | 17.2 $\pm$ 1.7      | 0.18              |
| Hematocrit %, mean $\pm$ SD                                      | 48.2 $\pm$ 8.7      | 51.4 $\pm$ 5.9      | 0.19              |
| Leukocytes ( $\times 10^9$ /L), mean $\pm$ SD                    | 8383 $\pm$ 2447     | 12557 $\pm$ 4537    | <b>0.005</b>      |
| Lymphocytes ( $\times 10^9$ /L), median (Q1-Q3)                  | 2775 (1795-4650)    | 3460 (2403-5373)    | 0.16              |
| Monocytes ( $\times 10^9$ /L), mean $\pm$ SD                     | 696.7 $\pm$ 418.9   | 992.4 $\pm$ 488.6   | 0.07              |
| Platelets ( $\times 10^3$ ), median (Q1-Q3)                      | 218 (147-261)       | 199 (182-263)       | 0.91              |
| Neutrophils ( $\times 10^9$ /L), mean $\pm$ SD                   | 4450 $\pm$ 2283     | 6760 $\pm$ 3056     | <b>0.02</b>       |
| Glucose (mg/dl), median (Q1-Q3)                                  | 70.2 (53.7- 90)     | 78 (59.2-112.3)     | 0.26              |
| Creatinine (mg/dl), mean $\pm$ SD                                | 0.6275 $\pm$ 0.1012 | 0.7362 $\pm$ 0.1672 | <b>0.04</b>       |
| Urea (mg/dl), median (Q1-Q3)                                     | 14.6 (11.1-19.1)    | 18.2 (13.21-23.6)   | 0.29              |
| Lactate, median (Q1-Q3)                                          | 3.4 (2-4.3)         | 3.5 (2.7-6.8)       | 0.26              |
| <b>Maternal Antecedents</b>                                      |                     |                     |                   |
| Preeclampsia, n (%)                                              | 0 (0)               | 5 (19)              | 0.10              |
| Gestational Diabetes, n (%)                                      | 3 (25)              | 3 (12)              | 0.29              |
| Type 1 Diabetes, n (%)                                           | 0 (0)               | 0 (0)               | NA                |
| Type 2 Diabetes, n (%)                                           | 0 (0)               | 0 (0)               | NA                |
| Obesity, n (%)                                                   | 1 (8)               | 0 (0)               | 0.31              |
| Drug Abuse, n (%)                                                | 0 (0)               | 3 (12)              | 0.22              |
| Syphilis, n (%)                                                  | 0 (0)               | 0 (0)               | NA                |
| Human Immunodeficiency (AIDS), n (%)                             | 0 (0)               | 1 (4)               | 0.49              |

|                                      |          |         |              |
|--------------------------------------|----------|---------|--------------|
| Condyloma, n (%)                     | 0 (0)    | 0 (0)   | NA           |
| Kidney Diseases, n (%)               | 0 (0)    | 0 (0)   | NA           |
| Anemia, n (%)                        | 0 (0)    | 2 (8)   | 0.32         |
| Urinary Infection, n (%)             | 2 (17)   | 11 (42) | 0.12         |
| Premature Labor, n (%)               | 12 (100) | 14 (54) | <b>0.004</b> |
| Placenta Previa, n (%)               | 1 (8)    | 3 (12)  | 0.76         |
| Chronic Arterial Hypertension, n (%) | 0 (0)    | 0 (0)   | NA           |

\*Significant values (p<0.05) are highlighted in bold
