# Supplementary material for: The Urinary Metabolome of Newborns with Perinatal Complications
Source: MDPI journal article supplement (doi:10.3390/metabo14010041), 2024-01-10
Supplement: s1 [file s1]

Supplementary Table S2: Urinary concentration values for NICU newborns and reference values found in HMDB ([www.hmdb.ca](http://www.hmdb.ca), accessed on May 30, 2023) and Pubmed (<https://pubmed.ncbi.nlm.nih.gov>, accessed on May 30, 2023 )

| Metabolite                     | HMDB CODE                   | This study<br>μmol/mmol Cr | Normal values<br>(HMDB)<br>μmol/mmol Cr | Abnormal values<br>(HMDB)<br>μmol/mmol Cr | Values reported in other studies<br>searched in Pubmed |
|--------------------------------|-----------------------------|----------------------------|-----------------------------------------|-------------------------------------------|--------------------------------------------------------|
| 1-Methylnicotinamide           | HMDB0000699                 | 61.37 (40.64-92.98)        | 0.82 (0.26-2.3)[11]                     | -                                         |                                                        |
| 3-Methoxytyramine              | HMDB0000022                 | 0.09 (0.07-0.14)           | -                                       | -                                         |                                                        |
| 5-Hydroxylysine                | HMDB0000450                 | 5.91 (4.13-8.16)           | 4.97 - 116.9[12]                        | -                                         | 37(13-114) μM/g Cr[13]                                 |
| 7-Methylguanine                | HMDB0000897                 | 10.79 +/- 0.86             | -                                       | -                                         |                                                        |
| α-Aminobutyric acid            | HMDB0000650,<br>HMDB0000452 | 0.48 (0.14-1.22)           | 1.13 +/- 4.52[14]                       | -                                         | 15.2(8-26) μM/g Cr[13]                                 |
| Asymmetric<br>dimethylarginine | HMDB0001539                 | 5.76 (4.47-7.58)           | 0.98-4.87[6]                            | -                                         | 14.8 (10.3–21.7) mmol/mmol Cr [15]<br>12.2 +/- 4.6[16] |
| Alanine                        | HMDB0000161                 | 75.45 (53.05-122.77)       | 32.25-147.8[6]                          | 427.6-681.4[17]                           | 1161(630-2227) μM/g Cr [13]                            |
| Allantoin                      | HMDB0000462                 | 16.48 (12.33-22.54)        | -                                       | -                                         | 19.1 +/-18.5[18]                                       |
| Arginine                       | HMDB0000517                 | 13.50 (9.47-21.18)         | 6.82-30.52[6]                           | -                                         | 424(288-731) μM/g Cr[13]                               |
| Asparagine                     | HMDB0000168                 | 12.77 (7.96-24.28)         | 0.42-10.5[6]                            | 20.7-447[19]                              | 528(264-1033) μM/g Cr[13]                              |
| Aspartic acid                  | HMDB0000191                 | 14.27 (9.19-21.64)         | 5.57-34.61[6]                           | -                                         | 2.6(0-16.5) μM/g Cr[13]                                |
| β-Alanine                      | HMDB0000056                 | 7.24 (5.07-11.33)          | 10.18 +/- 10.18[14]                     | -                                         | 1154(627-2224) μM/g Cr[13]                             |
| Betaine                        | HMDB0000043                 | 398.69 (286.91-503.31)     | 74.09-410.3[6]                          | -                                         | 13.62 ± 3.71[20]                                       |

|                  |             |                        |                     |                   |                                                         |
|------------------|-------------|------------------------|---------------------|-------------------|---------------------------------------------------------|
| Carnosine        | HMDB0000033 | 21.55 (8.70-83.05)     | 0.47-35.49[6]       | -                 | 1.45 ± 0.61 μmol/mmol Cr [20]<br>84(29-269) μM/g Cr[13] |
| Choline          | HMDB0000097 | 8.08 (5.14-11.09)      | 3.99-50.7[6]        | -                 |                                                         |
| Citrulline       | HMDB0000904 | 1.81 (1.26-3.21)       | 0 - 10.97[12]       | 63.8-549.4[19]    | 33(14-73) μM/g Cr[13]                                   |
| Creatine         | HMDB0000064 | 21.86 (7.18-123.08)    | 4.66-455.3[6]       | -                 |                                                         |
| Cystathionine    | HMDB0000099 | 10.73 (6.39-17.60)     | 32.79 +/- 27.13[14] | -                 | 349(153-703) μM/g Cr[13]                                |
| Cytidine         | HMDB0000630 | 0.27 (0.21-0.42)       | 1.1-10.7[21]        | -                 |                                                         |
| Diacetylspermine | HMDB0002172 | 2.29 (1.16-3.10)       | 0.37-3.11[6]        | -                 |                                                         |
| Dimethylamine    | HMDB0000087 | 71.95 (44.20-116.10)   | 20-60[21]           | -                 | 282 +/- 44 μmol/mmol Cr [16]                            |
| Dopamine         | HMDB0000073 | 0.29 +/- 0.02          | 0.13-2.63[6]        | 0.49 +/- 0.06[22] |                                                         |
| Ethanolamine     | HMDB0000149 | 296.05 +/- 25.65       | 31.89-427.74 [6]    | 204-1600[23]      | 3243(1345-5142) μM/g Cr[13]                             |
| Glutamine        | HMDB0000641 | 64.71 (51.53-108.46)   | 16.16-134.4[6]      | 0-8[24]           | 1144(647-2152) μM/g Cr[13]                              |
| Glutamic acid    | HMDB0000148 | 6.31 (4.56-16.08)      | 1.96-35.26[6]       | -                 | 96(48-178) μM/g Cr[13]                                  |
| Glycine          | HMDB0000123 | 419.12 (254.10-781.58) | 102.6-853.6[6]      | -                 | 7408(3343-14352) μM/g Cr[13]                            |
| Guanine          | HMDB0000132 | 0.28 (0.17-0.41)       | -                   | -                 |                                                         |
| Histidine        | HMDB0000177 | 63.73 (36.37-98.87)    | 21.09-188.1[6]      | 246.7-642.7[19]   | 1601(858-3265) μM/g Cr[13]                              |

|                      |             |                       |                      |                 |                                   |
|----------------------|-------------|-----------------------|----------------------|-----------------|-----------------------------------|
| Histamine            | HMDB0000870 | 0.012 +/- 0.001       | 0.01-0.04[6]         | -               |                                   |
| Homocitrulline       | HMDB0000679 | 3.14 (2.45-4.68)      | 0 - 10.18[12]        | -               |                                   |
| Hypoxanthine         | HMDB0000157 | 17.09 (10.51-28.19)   | <5.2[25]             | 88[26]          | 17 +/- 38 $\mu$ M/ $\mu$ M Cr[18] |
| Isoleucine           | HMDB0000172 | 2.35 (1.32-4.29)      | 0.29-7.30[6]         | -               |                                   |
| Inosine              | HMDB0000195 | 0.59 (0.38-1.00)      | 0-25[21]             | -               |                                   |
| Kynurenine           | HMDB0000684 | 0.18 (0.08-0.70)      | 0.02-0.71[6]         | -               |                                   |
| Leucine              | HMDB0000687 | 6.47 (4.23-15.05)     | 0.33-13.41[6]        | 53.9-17.7[19]   |                                   |
| Lysine               | HMDB0000182 | 119.52 (38.07-209.52) | 10.5-140.5[6]        | 268.3-365.2[19] | 2878(1304-7527) $\mu$ M/g Cr[13]  |
| Methionine           | HMDB0000696 | 3.68 (2.76-5.71)      | 0.54-4.81[6]         | -               | 34(14-69) $\mu$ M/g Cr[13]        |
| Methionine Sulfoxide | HMDB0002005 | 0.52 (0.21-0.99)      | 0.6-3.59[6]          | -               |                                   |
| Methylhistidine      | HMDB0000479 | 42.71 (31.68-56.08)   | 32.79 +/- 20.35[14]  | -               | 197(141-277) $\mu$ M/g Cr[13]     |
| N1-Acetylspermidine  | HMDB0001276 | 2.06 (1.74-3.53)      | -                    | -               |                                   |
| N-Acetylputrescine   | HMDB0002064 | 20.14 (11.77-28.46)   | -                    | -               |                                   |
| Nudifloramide        | HMDB0004193 | 17.23 (12.63-22.96)   | 0.71 (0.13-2.88)[11] | -               |                                   |

|                        |                              |                         |                                   |                 |                                                    |
|------------------------|------------------------------|-------------------------|-----------------------------------|-----------------|----------------------------------------------------|
| Ornithine              | HMDB0000214                  | 7.11 (2.36-19.71)       | 1.44-24.36[6]                     | 92.57-123.8[19] | 259(84-1051) $\mu\text{M/g Cr}$ [13]               |
| Phenylalanine          | HMDB0000159                  | 9.18 (7.09-15.78)       | 4.14-14.15[6]                     | 414.7[27]       | 122(74-207) $\mu\text{M/g Cr}$ [13]                |
| Proline                | HMDB0000162                  | 47.98 (34.13-109.22)    | 9.5-78.2[6]                       | -               | 1145(334-3459) $\mu\text{M/g Cr}$ [13]             |
| Putrescine             | HMDB0001414                  | 0.29 (0.17-0.46)        | 0.03-3.42[6]                      | -               |                                                    |
| Sarcosine              | HMDB0000271                  | 3.69 (2.01-5.49)        | 0.55-9.98[6]                      | 2703 [28]       | 192(113-514) $\mu\text{M/g Cr}$ [13]               |
| Serine                 | HMDB0000187                  | 106.75 (74.87-156.83)   | 32.19-145.5[6]                    | 341.6-735[19]   | 1640(805-3327) $\mu\text{M/g Cr}$ [13]             |
| Serotonin              | HMDB0000259                  | 0.12 (0.10-0.15)        | 0.1-0.35[6]                       | 0.22[29]        |                                                    |
| Taurine                | HMDB0000251                  | 1107.39 (537.18-1691.0) | 74.64-284[6]                      | 1261[26]        | 2939(289-10577) $\mu\text{M/g Cr}$ [13]            |
| Threonine              | HMDB0000167                  | 56.31 (24.51-119.66)    | 9.24-96.17[6]                     | 226.2-1060[19]  | 833(354-1810) $\mu\text{M/g Cr}$ [13]              |
| Trimethylamine N-oxide | HMDB0000925                  | 5.62 (0.36-10.44)       | 0.30-43.08[6]                     | -               |                                                    |
| Total Dimethylarginine | HMDB0003334 +<br>HMDB0001539 | 30.46 (22.86-37.28)     | 5.33-18.11[6]<br><br>0.98-4.87[6] | -               | 31.0 (21.7– 65.9) mmol/mmol Cr<br>26.1 +/- 4.5[16] |
| trans-4-Hydroxyproline | HMDB0000725                  | 67.94 (43.53-132.88)    | 8.12-92.19[6]                     | 1957[30]        | 744(304-1397) $\mu\text{M/g Cr}$ [13]              |
| Tryptophan             | HMDB0000929                  | 3.82 (2.59-6.49)        | 1.86-6.03[6]                      | -               | 50(27-99) $\mu\text{M/g Cr}$ [13]                  |
| Tryptamine             | HMDB0000303                  | 0.06 (0.04-0.08)        | -                                 | -               |                                                    |
| Tyrosine               | HMDB0000158                  | 5.03 (2.60-7.72)        | 2.1-14.81[6]                      | 35.15-369[19]   | 112(62-238) $\mu\text{M/g Cr}$ [13]                |

|          |             |                         |               |   |                                         |
|----------|-------------|-------------------------|---------------|---|-----------------------------------------|
| Tyramine | HMDB0000306 | 0.38 (0.27-0.52)        | 0.30-2.54[6]  | - |                                         |
| Uracil   | HMDB0000300 | 3.05 (1.76-4.24)        | 8-110[21]     | - |                                         |
| Uridine  | HMDB0000296 | 1.35 (0.71-2.90)        | 0-15[21]      | - |                                         |
| Valine   | HMDB0000883 | 8.60 (5.47-18.58)       | 0.99-18.44[6] | - | 135(67-284) $\mu$ M/g Cr[13]            |
| Glucose  | HMDB0000122 | 683.75 (382.16-1119.80) | 106.3-1193[6] | - | 30.67 $\pm$ 4.81 $\mu$ mol/mmol Cr [20] |
| C0       | HMDB0000062 | 2.87 (1.76-6.00)        | 0.79-5.66[6]  | - |                                         |
| C2       | HMDB0000201 | 0.67 (0.40-1.58)        | 0.38-1.86[6]  | - |                                         |
| C4:1     | HMDB0013126 | 0.02 (0.01-0.03)        | 0.01-0.04[6]  | - |                                         |
| C4       | HMDB0002013 | 0.21 (0.10-0.37)        | 0.05-0.33[6]  | - |                                         |
| C3OH     | HMDB0013125 | 0.02 (0.01-0.05)        | 0.01-0.06[6]  | - |                                         |
| C5:1     | HMDB0002366 | 0.07 (0.05-0.10)        | 0.03-0.16[6]  | - |                                         |
| C5       | HMDB0013128 | 0.10 (0.05-0.25)        | 0.02-0.29[6]  | - |                                         |
| C4OH     | HMDB0013127 | 0.05 (0.03-0.09)        | -             | - |                                         |
| C6:1     | HMDB0013161 | 0.04 (0.03-0.06)        | 0.01-0.02[6]  | - |                                         |

|                                |             |                  |                      |        |                               |
|--------------------------------|-------------|------------------|----------------------|--------|-------------------------------|
| C5OH                           | HMDB0013132 | 0.14 (0.10-0.21) | 0.04-0.29[6]         | -      |                               |
| C5:1DC                         | HMDB0013129 | 0.04 (0.02-0.05) | 0.0-0.03[6]          | -      |                               |
| C5DC                           | HMDB0013130 | 0.06 (0.05-0.08) | 0.02-0.1[6]          | -      |                               |
| C8                             | HMDB0000791 | 0.05 (0.04-0.09) | 0.02-0.31[6]         | -      |                               |
| C5MDC                          | HMDB0000552 | 0.08 (0.06-0.10) | 0.03-0.13[6]         | -      |                               |
| C9                             | HMDB0006320 | 0.07 (0.06-0.09) | -                    | -      |                               |
| C7DC                           | HMDB0013328 | 0.04 (0.03-0.05) | 0.02-0.09[6]         | -      |                               |
| C10:1                          | HMDB0013205 | 0.08 (0.02-0.15) | 0.03-0.2[6]          | -      |                               |
| C12:1                          | HMDB0013326 | 0.06 (0.02-0.08) | 0.02-0.14[6]         | -      |                               |
| C12DC                          | HMDB0013327 | 0.02 (0.01-0.03) | 0.01-0.29[6]         | -      |                               |
| C16:1                          | HMDB0013207 | 0.03 (0.02-0.05) | 0.0-0.03[6]          | -      |                               |
| 2-Hydroxy-3-methylvaleric acid | HMDB0000317 | 0.04 (0.02-0.06) | -                    | -      |                               |
| 2-Hydroxybutyric acid          | HMDB0000008 | 2.53 (1.56-6.08) | 5.0 (0.0-10.0)[11]   | -      |                               |
| 2-hydroxyglutaric acid         | HMDB0059655 | 18.25+/- 1.50    | 51.9 (13.7-97.3)[31] | 62[32] | 21.1 +/-5.5 µmol/mmol Cr [33] |

|                             |             |                       |                     |                       |                    |
|-----------------------------|-------------|-----------------------|---------------------|-----------------------|--------------------|
| 2-Hydroxyisobutyric acid    | HMDB0000729 | 0.60 (0.35-0.97)      | 0.1 (0.1-3.8)[31]   | -                     |                    |
| 2-oxoadipic acid            | HMDB0000225 | 12.41 (6.29-19.87)    | -                   | 135[34]               |                    |
| 2-oxoisocaproic acid        | HMDB0000695 | 0.58 (0.39-0.87)      | 0-0.2[21]           | -                     |                    |
| 3,4-Dihydroxybutyric acid   | HMDB0000337 | 5.26 (4.24-6.80)      | 73.0 +/- 24.0 [11]  | -                     |                    |
| 3-Deoxyglucosone            | HMDB0005876 | 7.12 (5.01-8.52)      | -                   | -                     |                    |
| 3-Hydroxybutyric acid       | HMDB0000011 | 1.62 (0.90-5.40)      | 0.72-23.3[6]        | 51.04-56.47[35]       | 16.28 +/- 3.50[33] |
| 3-Hydroxyisobutyric acid    | HMDB0000336 | 12.33 (5.09-23.56)    | -                   | -                     |                    |
| 3-Hydroxyisovaleric acid    | HMDB0000754 | 7.21 (4.65-11.74)     | 12.2 (0.1-43.2)[31] | 1154.8 [36]           |                    |
| 3-Hydroxyphenylacetic acid  | HMDB0000440 | 0.63 +/- 0.04         | -                   | 0.67 +/- 2.9[37]      |                    |
| 3-Methyladipic acid         | HMDB0000555 | 0.48 +/- 0.04         | -                   | -                     |                    |
| 4-Hydroxyphenylacetic acid  | HMDB0000020 | 7.96(4.70-14.16)      | 24.2 (8.6-73.2)[31] | 428.0 +/- 164.0[38]   |                    |
| 4-Hydroxyphenylpyruvic acid | HMDB0000707 | 150.31(60.04-507.20)  | 4.6 (0.1-21.3)[31]  | 24.00 +/- 30.5[37]    |                    |
| 5-Hydroxyindoleacetic acid  | HMDB0000763 | 8.69 +/- 0.38         | 11.0 (4.0-18.0)[39] | 0.9 +/- 0.0[39]       |                    |
| 5-Oxoproline                | HMDB0000267 | 22.99 (19.74-38.23)   | 7.3 (0.1-29.3)[31]  | 1980 – 6040[40]       |                    |
| alpha-Ketoglutaric acid     | HMDB0000208 | 162.32 (71.28-284.43) | 30.79-398.2[6]      | 385.200-1367.300 [41] |                    |

|                                |                             |                        |                       |                |                                   |
|--------------------------------|-----------------------------|------------------------|-----------------------|----------------|-----------------------------------|
| alpha-Ketoisovaleric acid      | HMDB0000019                 | 1.81 (0.52-5.32)       | 0.16 +/- 0.48 [42]    | -              |                                   |
| Argininic acid                 | HMDB00003148                | 8.21 (3.83-13.95)      | -                     | -              |                                   |
| Benzoic acid                   | HMDB00001870                | 0.52 (0.30-0.85)       | -                     | -              |                                   |
| Butyric acid + Isobutyric acid | HMDB00000039 + HMDB00001873 | 3.49 (1.36-5.61)       | 0.06-0.86[6]          | -              |                                   |
| Caproic acid                   | HMDB00000535                | 0.46 (0.14-0.75)       | 0.91 +/- 1.05[42]     | -              |                                   |
| Caprylic acid                  | HMDB00000482                | 0.15 (0.04-0.22)       | 0.39 +/- 0.37[42]     | -              |                                   |
| cis-Aconitic acid              | HMDB00000072                | 45.72 +/- 2.82         | 67.9 (14.3-100.7)[31] | 6.4-293.5[17]  |                                   |
| Citric acid                    | HMDB00000094                | 379.57 (228.21-614.87) | 39.6-893[6]           | 998[32]        |                                   |
| Dimethylglycine                | HMDB00000092                | 15.04 (11.87-21.42)    | 15-220[21]            | -              |                                   |
| Ethylmalonic acid              | HMDB00000622                | 4.14 (3.10-5.81)       | 0.012 +/- 0.00[33]    | 2.56-10.26[43] |                                   |
| 2,5-Furandicarboxylic acid     | HMDB00004812                | 1.39 (0.64-3.43)       | 2.7 (0.1-9.1)[31]     | -              |                                   |
| Fumaric acid                   | HMDB00000134                | 10.34 (6.40-21.12)     | 2.09-37.66[6]         | 17-124[44]     |                                   |
| Glutaric acid                  | HMDB00000661                | 1.51 (0.74-3.15)       | 1.896 +/- 0.862 [33]  | 3.3-44.0[45]   | 7.623 +/- 3.321 μmol/mmol Cr [33] |
| Glyceric acid                  | HMDB00000139                | 3.18 (1.06-7.97)       | 21.6 (0.5-91.1) [31]  | -              |                                   |
| Guanidinopropionic acid        | HMDB00013222                | 13.71 (6.38-69.84)     | -                     | -              |                                   |
| Guanidoacetic acid             | HMDB00000128                | 11.30 (7.28-20.30)     | 93-190 [21]           | -              |                                   |



|                        |             |                       |                     |                    |                                  |
|------------------------|-------------|-----------------------|---------------------|--------------------|----------------------------------|
|                        |             |                       |                     |                    |                                  |
| Hippuric acid          | HMDB0000714 | 27.57 (16.64-44.00)   | 1.51-213[6]         | -                  | 189.79 ± 5.24 μmol/mmol Cr[20]   |
| Indolelactic acid      | HMDB0000671 | 0.11 (0.07-0.22)      | -                   | -                  |                                  |
| Indoxyl sulfate        | HMDB0000682 | 2.57 (1.67-4.03)      | -                   | -                  |                                  |
| Isocitric acid         | HMDB0000193 | 45.72 +/- 2.77        | 19.0 (5.0-34.0)[11] | -                  |                                  |
| Kynurenic acid         | HMDB0000715 | 4.94 (3.81-7.06)      | -                   | -                  |                                  |
| Lactic acid            | HMDB0000190 | 165.77 (85.81-350.52) | 46.99-774.2[6]      | 352[32]            |                                  |
| Maleic acid            | HMDB0000176 | 1.14 (0.73-1.78)      | 10.4 [31]           | -                  |                                  |
| Malic acid             | HMDB0000156 | 64.79 (32.94-109.83)  | 36.1(12.4-121.6[31] | 110 [32]           |                                  |
| Malonic acid           | HMDB0000691 | 0.92 +/- 0.07         | -                   | 2170.7-5438.1 [46] |                                  |
| Methylmalonic acid     | HMDB0000202 | 0.87 (0.36-1.23)      | 0.42-19.74[6]       | -                  | 32.192+/-6.937μmol/mmol Cr [33]  |
| Orotic acid            | HMDB0000226 | 2.05 +/- 0.15         | 0.061 +/- 0.003[33] | >20 [47]           | 1.129 +/- 0.874μmol/mmol Cr [33] |
| Phenylacetic acid      | HMDB0000209 | 0.12 (0.08-0.19)      | -                   | 55.6 +/- 87.3[37]  |                                  |
| Phenylacetylglutamine  | HMDB0006344 | 22.67 (17.32-33.98)   | -                   | -                  |                                  |
| p-Hydroxyhippuric acid | HMDB0013678 | 4.55 (3.40-7.47)      | 4.2-19.59[6]        | -                  |                                  |
| Pipecolic acid         | HMDB0000070 | 0.15 (0.14-0.24)      | 0 - 25.33 [12]      | -                  |                                  |

|                  |             |                       |                    |             |  |
|------------------|-------------|-----------------------|--------------------|-------------|--|
|                  |             |                       |                    |             |  |
| Propionic acid   | HMDB0000237 | 8.40 (3.04-13.01)     | 0-76[21]           | -           |  |
| Pyruvic acid     | HMDB0000243 | 7.17 (5.60-13.41)     | 9.55-89.06[6]      | -           |  |
| Quinaldic acid   | HMDB0000842 | 0.01 (0.01-0.02)      | -                  | -           |  |
| Quinolinic acid  | HMDB0000232 | 18.29 (14.14-24.02)   | 0.67 +/- 1.34 [42] | -           |  |
| Shikimic acid    | HMDB0003070 | 0.68 +/- 0.04         | -                  | -           |  |
| Succinic acid    | HMDB0000254 | 111.02 (31.39-241.29) | 4.35-81.2[6]       | 75-185 [44] |  |
| Tartaric acid    | HMDB0000956 | 1.47 (0.95-2.88)      | 0-60[21]           | -           |  |
| Threonic acid    | HMDB0000943 | 89.49 (69.00-103.31)  | 63.0 +/- 21.0 [11] | -           |  |
| Uric acid        | HMDB0000289 | 927.36 +/- 78.40      | 218.8-4202[6]      | 20 [26]     |  |
| Tiglylglycine    | HMDB0000959 | 0.79 (0.55-0.97)      | 0-3.8[48]          | 87[49]      |  |
| Xanthine         | HMDB0000292 | 12.90 (7.06-23.41)    | <40 [50]           | 991[26]     |  |
| Xanthosine       | HMDB0000299 | 2.14 (1.63-3.42)      | -                  | -           |  |
| N1-Acetyl-Lysine | HMDB0000446 | 0.67 (0.48-1.15)      | -                  | -           |  |
| N6-Acetyl-Lysine | HMDB0000206 | 1.14 (0.90-1.49)      | -                  | -           |  |
| N-Acetyl-Alanine | HMDB0000766 | 4.00 (1.75-8.27)      | -                  | -           |  |

|                        |             |                     |                      |                |  |
|------------------------|-------------|---------------------|----------------------|----------------|--|
| N-Acetyl-Arginine      | HMDB0004620 | 1.84 (1.07-2.66)    | -                    | -              |  |
| N-Acetyl-Asparagine    | HMDB0006028 | 2.69 (2.05-4.40)    | -                    | -              |  |
| N-Acetyl-Aspartic acid | HMDB0000812 | 26.26 (18.78-40.70) | 33.2 (4.9-65.5) [31] | -              |  |
| N-Acetyl-Glutamine     | HMDB0006029 | 4.12 +/- 0.22       | -                    | -              |  |
| N-Acetyl-Glutamic acid | HMDB0001138 | 3.47 (2.78-4.83)    | 0-42[21]             | -              |  |
| N-Acetyl-Glycine       | HMDB0000532 | 4.16 (3.28-5.36)    | 0 [51]               | 170 +/- 18[51] |  |
| N-Acetyl-Histidine     | HMDB0032055 | 8.13 (3.72-9.89)    | -                    | -              |  |
| N-Acetyl-Isoleucine    | HMDB0061684 | 0.47 (0.32-0.74)    | -                    | -              |  |
| N-Acetyl-Leucine       | HMDB0011756 | 0.54 (0.34-1.12)    | -                    | -              |  |
| N-Acetyl-Methionine    | HMDB0011745 | 1.22 (0.91-1.40)    | -                    | -              |  |
| N-Acetyl-Proline       | HMDB0094701 | 0.43 (0.25-0.60)    | -                    | -              |  |
| N-Acetyl-Serine        | HMDB0002931 | 5.02 (2.63-8.14)    | -                    | -              |  |
| N-Acetyl-Tyrosine      | HMDB0000866 | 0.22 (0.1-0.55)     | 1.6 (0-6.4) [52]     | 75 (0-781)[52] |  |
| N-Acetyl-Valine        | HMDB0011757 | 0.73 (0.53-0.83)    | -                    | -              |  |
