# Supplementary material for: The Urinary Metabolome of Newborns with Perinatal Complications
Source: MDPI journal article supplement (doi:10.3390/metabo14010041), 2024-01-10
Supplement: s1 [file s1]

Supplementary Table S5: Pathway Analysis: Healthy vs. NICU newborns

|                                                     | Total Cmpd | Hits | Raw p      | Holm adjust | FDR        | Impact  |
|-----------------------------------------------------|------------|------|------------|-------------|------------|---------|
| Pantothenate and CoA biosynthesis                   | 20         | 5    | 7.26E-06   | 0.00028326  | 0.00028326 | 0.04762 |
| Tyrosine metabolism                                 | 42         | 8    | 0.00025548 | 0.0097081   | 0.0029331  | 0.41897 |
| Cysteine and methionine metabolism                  | 33         | 4    | 0.00027853 | 0.010306    | 0.0029331  | 0.30484 |
| Valine, leucine and isoleucine degradation          | 40         | 6    | 0.00036238 | 0.013046    | 0.0029331  | 0.04432 |
| Valine, leucine and isoleucine biosynthesis         | 8          | 6    | 0.00037604 | 0.013161    | 0.0029331  | 0       |
| Citrate cycle (TCA cycle)                           | 20         | 8    | 0.00069093 | 0.023492    | 0.0043338  | 0.39695 |
| Ubiquinone and other terpenoid-quinone biosynthesis | 18         | 2    | 0.00077786 | 0.025669    | 0.0043338  | 0.07692 |
| Arginine and proline metabolism                     | 36         | 10   | 0.0011344  | 0.036301    | 0.0053267  | 0.63139 |
| Phenylalanine, tyrosine and tryptophan biosynthesis | 4          | 3    | 0.0012292  | 0.038106    | 0.0053267  | 1       |
| Glycine, serine and threonine metabolism            | 33         | 12   | 0.0020501  | 0.061504    | 0.0079955  | 0.74668 |
| Propanoate metabolism                               | 22         | 4    | 0.0022661  | 0.065717    | 0.0080344  | 0       |
| beta-Alanine metabolism                             | 21         | 5    | 0.0027642  | 0.077398    | 0.0089837  | 0.45522 |
| Histidine metabolism                                | 16         | 6    | 0.0037496  | 0.10124     | 0.010517   | 0.49999 |
| Butanoate metabolism                                | 15         | 5    | 0.0041723  | 0.10848     | 0.010517   | 0       |
| Arginine biosynthesis                               | 14         | 9    | 0.0045983  | 0.11496     | 0.010517   | 0.48223 |
| Lipoic acid metabolism                              | 28         | 4    | 0.0046253  | 0.11496     | 0.010517   | 0.0017  |
| Purine metabolism                                   | 70         | 6    | 0.0049053  | 0.11496     | 0.010517   | 0.03965 |
| Glyoxylate and dicarboxylate metabolism             | 32         | 10   | 0.0050758  | 0.11496     | 0.010517   | 0.28308 |
| Lysine degradation                                  | 30         | 4    | 0.0051236  | 0.11496     | 0.010517   | 0.1227  |

|                                             |    |    |          |         |          |         |
|---------------------------------------------|----|----|----------|---------|----------|---------|
| Alanine, aspartate and glutamate metabolism | 28 | 11 | 0.017862 | 0.35724 | 0.034831 | 0.67148 |
| Biotin metabolism                           | 10 | 1  | 0.031381 | 0.59624 | 0.058279 | 0       |
| Glutathione metabolism                      | 28 | 5  | 0.036569 | 0.65825 | 0.064828 | 0.12267 |
| Pyrimidine metabolism                       | 39 | 5  | 0.040608 | 0.69034 | 0.068857 | 0.13943 |
| Glycolysis / Gluconeogenesis                | 26 | 3  | 0.058748 | 0.93996 | 0.095465 | 0.09806 |
| Pyruvate metabolism                         | 23 | 4  | 0.10596  | 1       | 0.1653   | 0.21967 |
| Glycerolipid metabolism                     | 16 | 1  | 0.12688  | 1       | 0.18327  | 0.09346 |
| Pentose phosphate pathway                   | 23 | 1  | 0.12688  | 1       | 0.18327  | 0       |
| Selenocompound metabolism                   | 20 | 1  | 0.13717  | 1       | 0.19106  | 0       |
| Phenylalanine metabolism                    | 8  | 3  | 0.18364  | 1       | 0.24697  | 0.35714 |
| Tryptophan metabolism                       | 41 | 6  | 0.19951  | 1       | 0.25936  | 0.39596 |
| Taurine and hypotaurine metabolism          | 8  | 1  | 0.3709   | 1       | 0.46661  | 0.42857 |
| Nitrogen metabolism                         | 6  | 2  | 0.3927   | 1       | 0.47861  | 0       |
| Primary bile acid biosynthesis              | 46 | 2  | 0.48452  | 1       | 0.54071  | 0.01516 |
| Porphyrin metabolism                        | 31 | 2  | 0.50342  | 1       | 0.54071  | 0       |
| Fatty acid biosynthesis                     | 47 | 1  | 0.50542  | 1       | 0.54071  | 0       |
| D-Amino acid metabolism                     | 15 | 1  | 0.51298  | 1       | 0.54071  | 0       |
| Sphingolipid metabolism                     | 32 | 1  | 0.51298  | 1       | 0.54071  | 0       |
| Nicotinate and nicotinamide metabolism      | 15 | 4  | 0.54867  | 1       | 0.56311  | 0.13816 |
| Glycerophospholipid metabolism              | 36 | 2  | 0.9018   | 1       | 0.9018   | 0.03906 |
