# Supplementary figures and images for: The Urinary Metabolome of Newborns with Perinatal Complications
Source: MDPI journal article supplement (doi:10.3390/metabo14010041), 2024-01-10

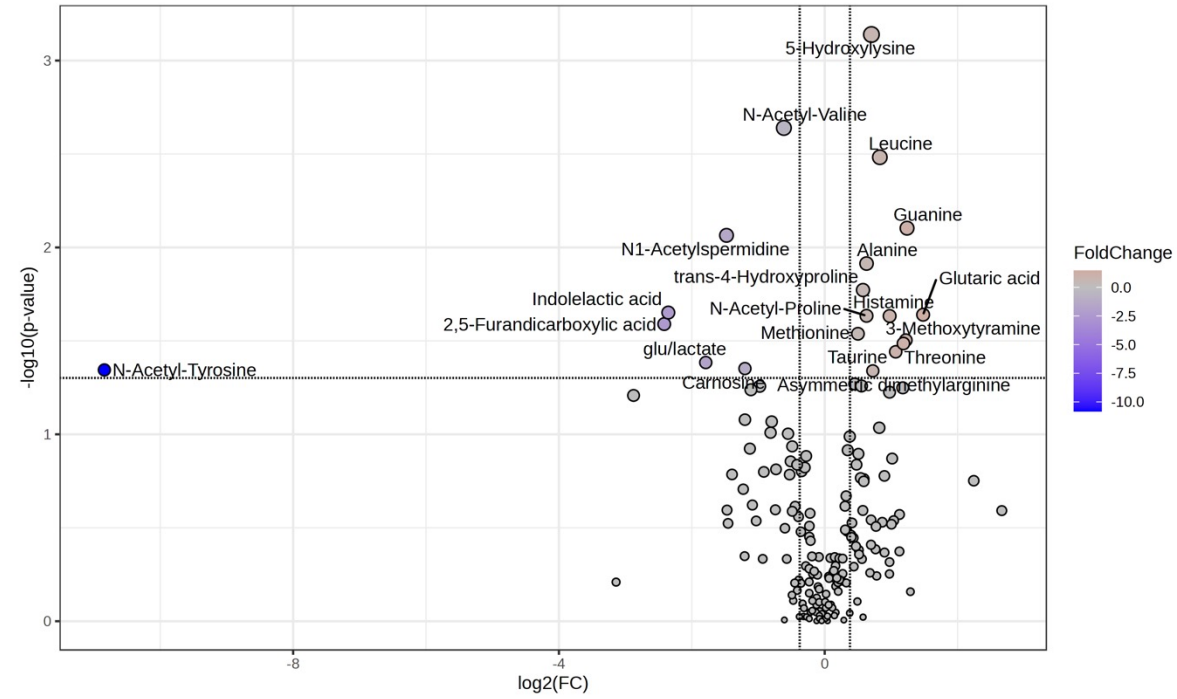

Supplementary Figure S1: Volcano plot: cesarean vs. vaginal delivery in BPD newborns (c/v)

Supplement: s1 [file s1]
